# Supplementary material
Source: Royal Society of Chemistry journal article supplement (doi:10.1039/d6mh00428h)
Supplement: d6mh00428h1.pdf [file d6mh00428h1.pdf]

## Supporting Information

### Highly Conductive and Flexible Ag NWs/PBFDO:PEOx Composite Transparent Electrodes Enabling Efficient Interfacial Tunneling Injection for OLED

Jiamin Sun <sup>a</sup>, Guancheng Zhu <sup>a</sup>, Zishuo Xu <sup>a</sup>, Aoxue Yang <sup>a</sup>, Feng Peng <sup>c</sup>, Yangbing Huang <sup>c</sup>,  
Haoran Tang <sup>a\*</sup>, Jianhua Zou <sup>b\*</sup>, Hong Tao <sup>b</sup>, Lei Wang <sup>a\*</sup>, Fei Huang <sup>a</sup>, Junbiao Peng <sup>a</sup>

E-mail: mstanghaoran@scut.edu.cn (H. Tang); zou1007@gmail.com (J. Zou); mslwang@scut.edu.cn (L. Wang)

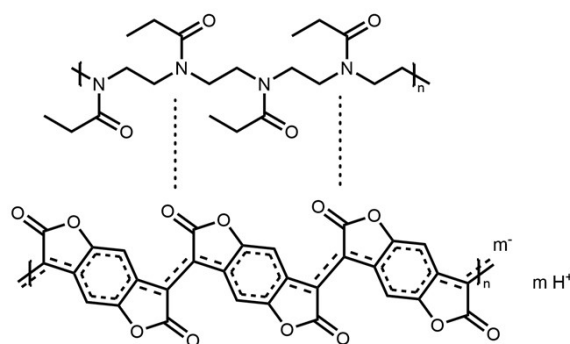

Figure S1. Chemical structure of PBFDO:PEOx.

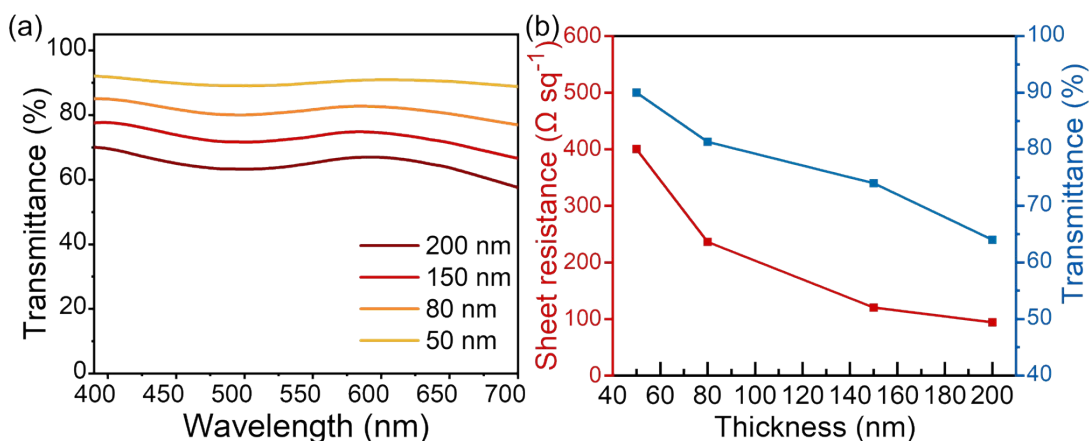

Figure S2. (a) Transmittance spectra of PBFDO:PEOx films with different thickness. (b) The dependence of sheet resistance and transmittance of PBFDO:PEOx films on film thickness.

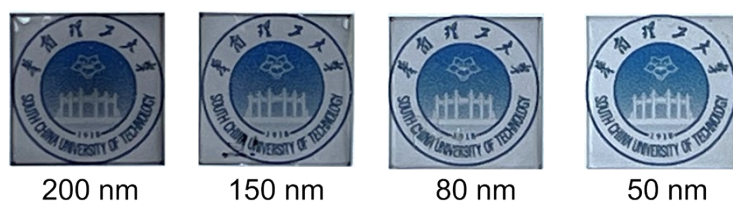

Figure S3. Photos of PBFDO:PEOx films with different thickness.

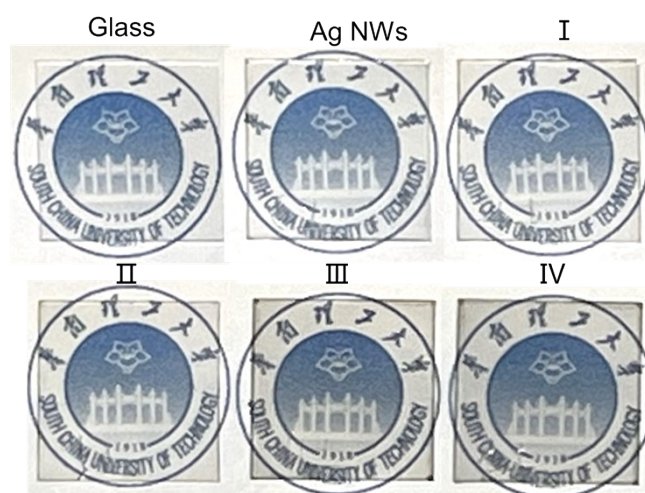

Fig S4. Photos of Ag NWs/PBFDO:PEOx composite films with different PBFDO:PEOx concentrations, pure Ag NWs film, and glass substrate.

Table.S1. Optoelectronic characteristics of different electrodes.

|            | Concentration of<br>PBFDO:PEOx<br>(mg/ml) | $T_{550nm}$<br>(%) | $R_s$<br>( $\Omega \text{ sq}^{-1}$ ) | FoM |
|------------|-------------------------------------------|--------------------|---------------------------------------|-----|
| Film I     | 2.7                                       | 94                 | 18                                    | 338 |
| Film II    | 4.8                                       | 93                 | 16                                    | 315 |
| Film III   | 8                                         | 90                 | 15                                    | 233 |
| Film IV    | 12                                        | 86                 | 12                                    | 199 |
| PBFDO:PEOx | 19.2                                      | 64                 | 94                                    | 8   |
| Ag NWs     | -                                         | 95                 | 65                                    | 113 |
| ITO        | -                                         | 94                 | 12                                    | 507 |

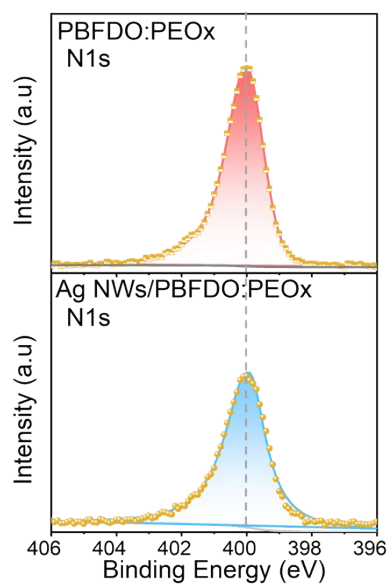

Figure S5. XPS spectra of N1s binding energy of PBFDO:PEOx and Ag NWs/PBFDO:PEOx

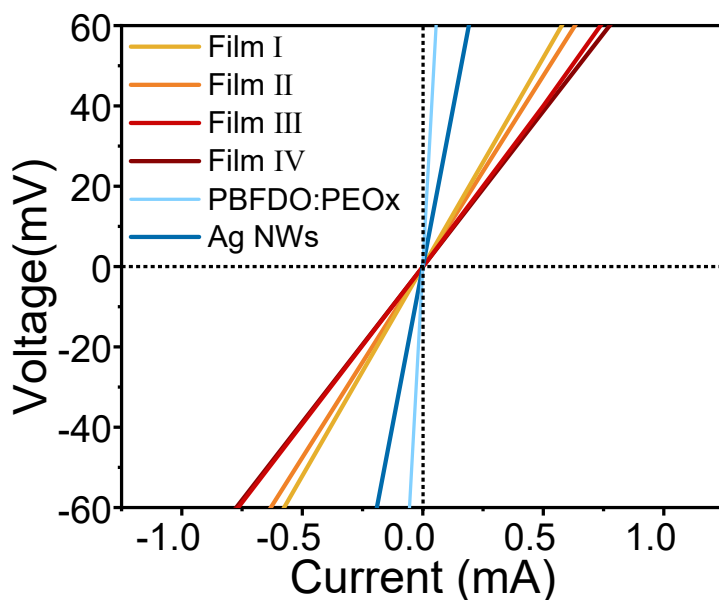

Figure S6. Current-voltage ( $I$ - $V$ ) curves of different films.

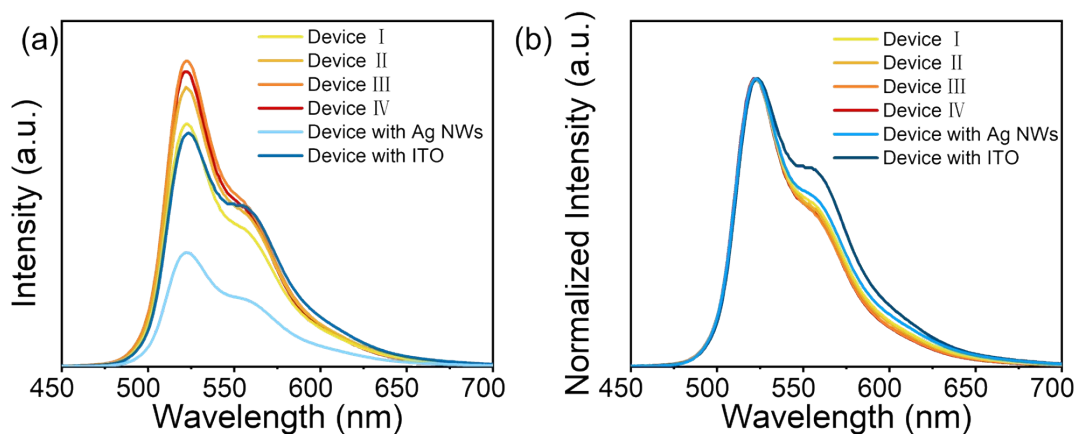

Figure S7. (a) EL spectra and (b) normalized EL spectra of devices with different electrodes.

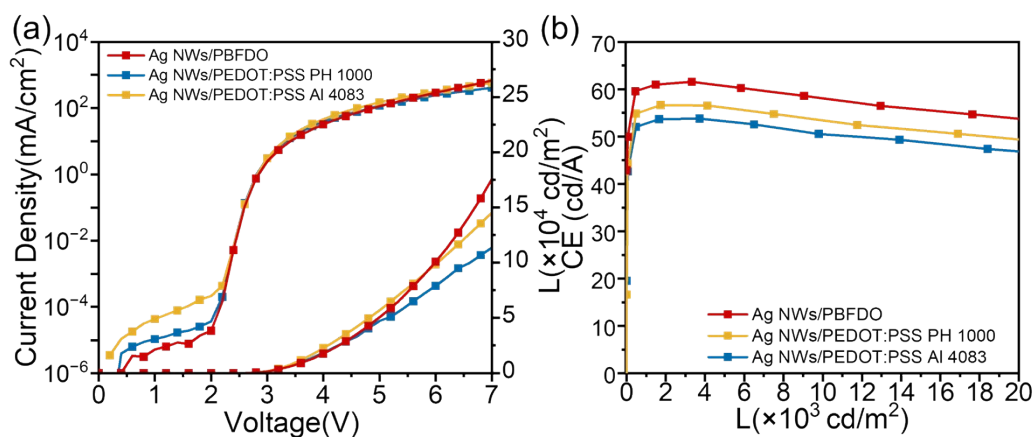

Figure S8. (a)  $J$ - $V$ - $L$ , and (b)  $CE$ - $L$  characteristics of the OLEDs with different anodes.

Table S2. Performance OLEDs with different anodes.

|                           | $V_{on}$<br>(V) | $CE_{max}$<br>( $cd A^{-1}$ ) | At $L = 1000 cd m^{-2}$ |                  |                 |
|---------------------------|-----------------|-------------------------------|-------------------------|------------------|-----------------|
|                           |                 |                               | $V$                     | $J$              | $CE$            |
|                           |                 |                               | (V)                     | ( $mA cm^{-2}$ ) | ( $cd A^{-1}$ ) |
| Device III                | 2.4             | 61.5                          | 3                       | 1.6              | 61.0            |
| Device with PEDOT PH1000  | 2.4             | 56.6                          | 3                       | 1.7              | 57.9            |
| Device with PEDOT AI 4083 | 2.4             | 53.8                          | 3                       | 1.9              | 53.0            |

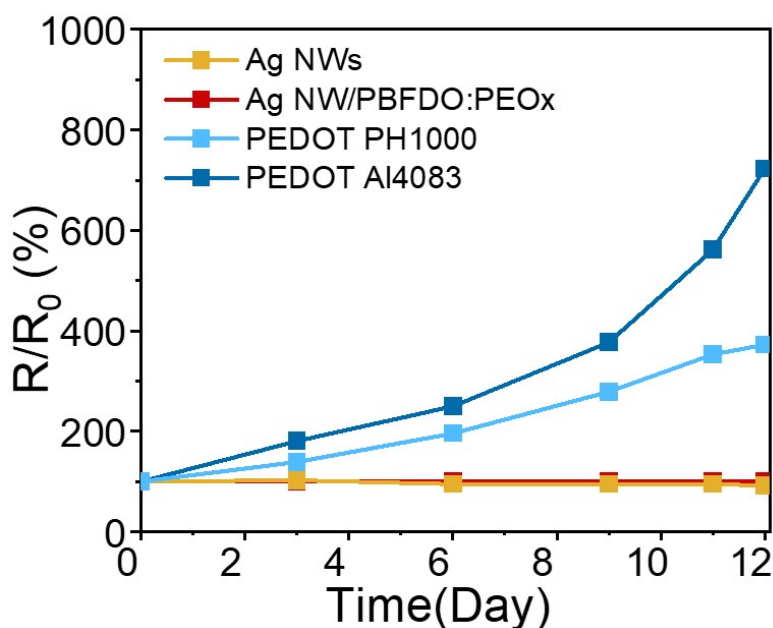

Figure S9. The electrical resistance changes of different electrodes after aging tests at 80°C.

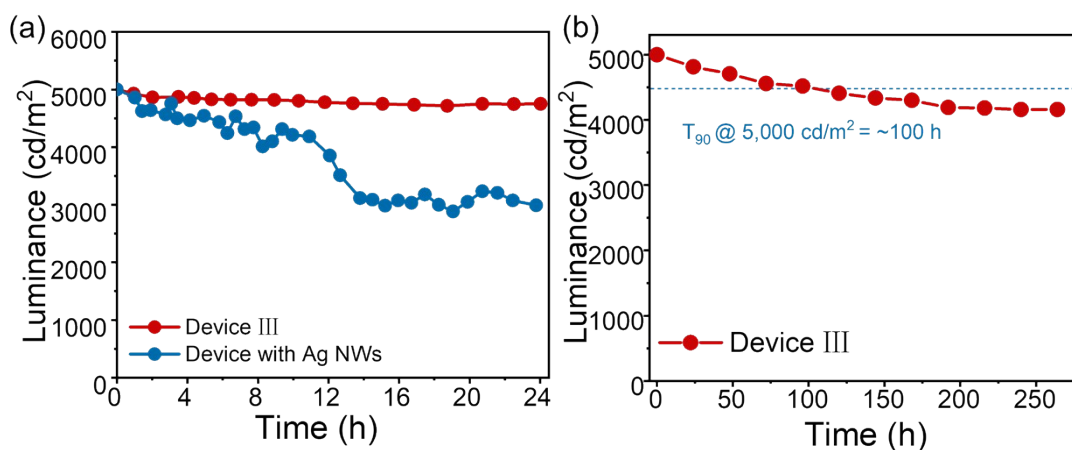

Figure S10. (a) Luminance-time curve of OLED devices based on pure Ag NWs electrode and Ag NWs/PBFDO:PEOx composite electrode under the initial luminance of 5000 cd/m<sup>2</sup>. (b) Luminance-time curve of OLED devices based on Ag NWs/PBFDO:PEOx composite electrode under the initial luminance of 5000 cd/m<sup>2</sup>.

Table.S3. Performance of flexible OLEDs with different electrodes.

|                      | $V_{\text{on}}$<br>(V) | $CE_{\text{max}}$<br>(cd A <sup>-1</sup> ) | At $L = 1000 \text{ cd m}^{-2}$ |                               |                             |
|----------------------|------------------------|--------------------------------------------|---------------------------------|-------------------------------|-----------------------------|
|                      |                        |                                            | $V$<br>(V)                      | $J$<br>(mA cm <sup>-2</sup> ) | CE<br>(cd A <sup>-1</sup> ) |
| F-Device I           | 2.6                    | 39.9                                       | 3.0                             | 2.5                           | 39.4                        |
| F-Device II          | 2.6                    | 40.0                                       | 3.0                             | 2.5                           | 39.3                        |
| F-Device III         | 2.6                    | 43.0                                       | 3.0                             | 2.4                           | 42.0                        |
| F-Device IV          | 2.6                    | 37.6                                       | 3.4                             | 2.7                           | 36.6                        |
| F-Device with Ag NWs | 2.6                    | 19.5                                       | 3.6                             | 6.2                           | 16.1                        |
| F-Device with ITO    | 2.6                    | 40.6                                       | 3.0                             | 2.6                           | 39.5                        |

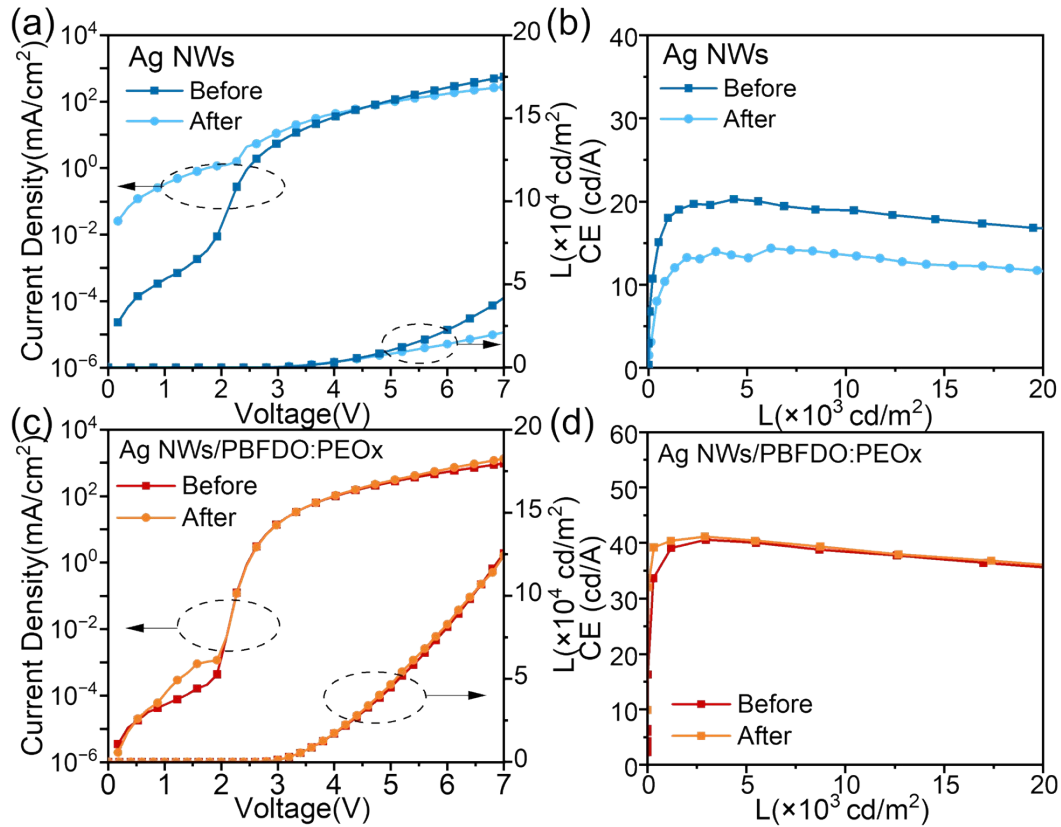

Figure S11. (a) The  $J$ - $V$ - $L$ , and (c)  $CE$ - $L$  characteristics of the OLED devices with pure AgNWs anodes before and after bending. (c)  $J$ - $V$ - $L$ , and (d)  $CE$ - $L$  characteristics of the OLED devices with AgNWs/PBFDO:PEOx anodes before and after bending.

Table S4. Performance OLEDs with different anodes before and after bending.

|                                             | $V_{\text{on}}$<br>(V) | $CE_{\text{max}}$<br>(cd A <sup>-1</sup> ) | At $L = 1000 \text{ cd m}^{-2}$ |                        |                       |
|---------------------------------------------|------------------------|--------------------------------------------|---------------------------------|------------------------|-----------------------|
|                                             |                        |                                            | $V$                             | $J$                    | $CE$                  |
|                                             |                        |                                            | (V)                             | (mA cm <sup>-2</sup> ) | (cd A <sup>-1</sup> ) |
| Device with AgNWs-Before bending            | 2.4                    | 20.6                                       | 3.4                             | 5.6                    | 18.0                  |
| Device with AgNWs-After bending             | 2.4                    | 14.0                                       | 3.2                             | 9.1                    | 11.0                  |
| Device with AgNWs/PBFDO:PEOx-Before bending | 2.4                    | 40.6                                       | 3                               | 2.6                    | 39.1                  |
| Device with AgNWs/PBFDO:PEOx-After bending  | 2.4                    | 41.1                                       | 3                               | 2.5                    | 40.4                  |

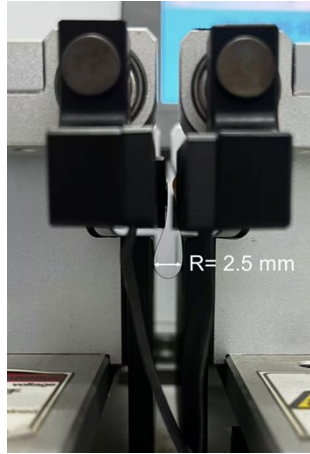

Figure S12. Image of the bending test machine and the bended film.
